# Supplementary material
Source: publisher site journal article supplement (https://www.degruyter.com/publication/journal_key/AGPH/downloadAsset/AGPH_AGPh_Stylesheet.pdf)
Supplement: Supplementary file 1 [file AGPH_AGPh_Stylesheet.pdf]

# Archiv für Geschichte der Philosophie

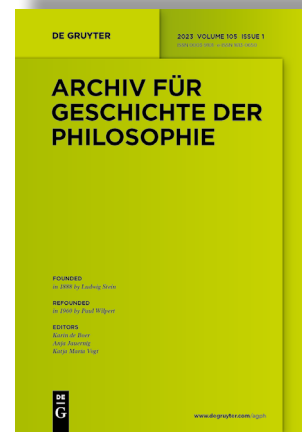

## Table of Content

|                                             |          |
|---------------------------------------------|----------|
| <b>Preparation of manuscript.....</b>       | <b>2</b> |
| Title page information.....                 | 2        |
| Language.....                               | 2        |
| General Style Guidelines.....               | 2        |
| General format and manuscript elements..... | 2        |
| Abstract.....                               | 3        |
| Keywords.....                               | 3        |
| Headings .....                              | 3        |
| Quotations.....                             | 3        |
| References.....                             | 3        |
| Footnotes and Citations .....               | 3        |
| Bibliography .....                          | 4        |
| Book Reviews .....                          | 5        |
| Figures and figure captions .....           | 5        |
| Tables and table captions .....             | 5        |

## Preparation of manuscript

### Title page information

Please provide a title page as a separate Word file during submission process including the following information:

- Authors names

Write at least one given and family name in full. For all other names, initial is sufficient. List authors in the order you want them to appear in the final version. Indicate the corresponding author by using an asterisk “\*” after the family name. Please note that as per De Gruyter policy, no author list changes are permitted after acceptance of a manuscript.

Author footnotes (superscript letters or numbers) to explain authorship details are not all allowed in the author line and will be converted to an author note on the first page. Kindly stick to the wording as in the examples below:

- [Full name author A] and [full name author B] contributed equally to this work.
- [Full name author A] and [full name author B] contributed equally to this work and share first authorship.
- [Full name author A] and [full name author B] share senior authorship.
- [Full name author A] and [full name author B] share first authorship.

- Title and short title

Provide a descriptive, concise and comprehensible main title as well as an abbreviated form of the main title (running head) with no more than 40 characters (including blanks). The short title will be displayed on the top of each page of the final version.

The article title and subtitle should be in title case. Use uppercase letters after colon.

- Affiliations

For the corresponding author supply the following details: e-mail address, department, institution, street, city, postal code and country; for all other authors department, institution, city, postal code and country are mandatory. Please also provide all details concerning the current institutional affiliation in case you changed affiliation during the manuscript preparation and publication process.

Supplying an ORCID is highly recommended (for more information and registration, please visit the ORCID webpage: <https://info.orcid.org/benefits-for-researchers/>)

- Please also indicate the word count, number of tables and figures, and whether your manuscript contains supplementary material.

### Language

All manuscripts must be written in clear and concise US English or German. De Gruyter does provide a *technical* copyedit of manuscripts, but the ultimate responsibility for the entire text remains with the author. If you have reasons to doubt your proficiency with respect to spelling, grammar, etc., then you may wish to employ – at your expense – the services of a professional language editor.

### General Style Guidelines

- Font: Times New Roman, 12 point
- Margins: At least 3 cm (1.2 inches) on both sides.
- Line spacing: 1.5 (footnotes included).
- Word spacing: only one space between a period and a word.
- Accepted papers should also conform to the style and format guidelines below.

### General format and manuscript elements

The length of submissions should be appropriate to the content. While most submissions accepted by *Archiv* are between 8,000 and 15,000 words (including bibliography), shorter or longer texts will also be considered.

Submissions should be in word format (.docx). Submissions containing non-Roman characters (Greek, Hebrew, Arabic, etc.) should be submitted in both .docx and .pdf format.

In order to ensure blind review, authors are asked to remove any identifying information from all documents and keep them on the title page only.

### Abstract

Please provide a concise summary of your article in an abstract of approx. 100–150 words in a single paragraph. As abstracts are published separately by abstracting and indexing services, please spell out abbreviations at first use and do not use references.

### Keywords

Keywords are used by abstracting and indexing services as well as search engines to facilitate finding your paper. Together with the abstract of your paper, they are a key tool enabling readers to find your paper and for increasing citations.

Please supply 4–6 specific keywords in lower case and separated by a comma.

These can be single words, but also short phrases representing the content. Make sure to select precise and concise keywords to your field or sub-field of research. Avoid abbreviations and the repetition of words already used in the article's title.

### Headings

The manuscript should be subdivided into sections (and, if necessary, subsections). These sections should be labeled with headings in a consistent format and with a clear hierarchy of section headings. Limit your subsections to a maximum of four levels. For subdivided sections ensure that they have at least two subheadings on one level. Headings do not have an end period.

Headings should be numbered and in title case. Use uppercase letters after colon, even for articles.

### Quotations

- Double quotation marks (“”) should be used for short quotations. Single quotation marks (‘’) should be used (a) to refer to terms and phrases, and (b) to indicate quotations within quotations.
- Quotations exceeding three lines of text should be formatted as block quotes.
- Omissions from quoted texts should be indicated by three periods in square brackets, separated from the preceding and the succeeding word by a single space. Omissions at the beginning or end of the quoted text should not be indicated. E.g.:
  - (a) As Conway claims, “it is not the essence or entity itself [...] that changes.”<sup>13</sup>
  - (b) Kant claims that without sensibility “no object would be given to us.”<sup>1</sup>
- The period that concludes a quotation should be put outside the quotation, with the exception of cases where the quotation consists of an independent sentence. E.g.:
  - (a) Kant states: “Without sensibility no object would be given to us, and without understanding none would be thought.” (A51/B75).
  - (b) Kant claims that “[w]ithout sensibility no object would be given to us, and without understanding none would be thought” (A51/B75).
- In the case of translated texts, quoted terms or clauses in the original language should be set in italics and inside round parentheses.
- In the case of languages such as Greek or Arabic, the text can be rendered using either the original characters or transliterations. For a guide to transliteration, see the Chicago Manual of Style.

### References

#### Footnotes and Citations

- All comments and explanatory notes should be placed in footnotes, not endnotes.
- Citations can be either in-text or included in the footnotes. Multiple citations of secondary texts in a row should be included in the footnotes.
- Primary texts should be cited according to established conventions, e.g., Stephanus pagination for the works of Plato, *Akademie Ausgabe* for Kant. If there are multiple conventions for citing an author, the more concise one is preferred. For example, in the case of Kant's works, it suffices to indicate abbreviated title, volume, and page number (e.g., Prol, 4:271).
- If abbreviations are used to cite primary texts or editions (e.g., SL for *Science of Logic*; AT for the Adam & Tannery edition of Descartes), an abbreviation key should be included at the beginning of the bibliography. See under ‘Bibliography’ below. Abbreviations should not be in italics.

- Citation format (in the following order): the name of the author, the year of publication, followed by a comma and the page reference, e.g.: Barnes 1982, 25–27. Lists of citations should be separated by semicolons. References can but need not be put in brackets. E.g.:

(a) As Silverman has argued, “the explanation of the sensible qualities of bodies requires the introduction of the soul” (Silverman 1991, 127).

(b) On this issue, see Silverman 1991, 127; Downing 1995, 292–294; Lee 2011.

- References to a text already quoted should be given in the way indicated above; do not use ‘Ibid.’ etc..
- Footnote numbers should be placed (a) after the final punctuation unless (b) the sentence contains various quotations. E.g.:

(a) Descartes’s remark that “the true triangle is contained in the figure only in the way in which a statue of Mercury is contained in a rough block of wood” deserves further comment.<sup>20</sup>

(b) We are instructed to examine our ideas of secondary qualities and recognize that these properties are nothing but “sensations and thoughts,” and further that when “they are judged to be real things existing outside our mind,” we have no means of making their nature intelligible to us.<sup>9</sup>

- Use en dashes between numbers (e.g., 228–234).
- A range of page numbers should be given in full (e.g., 228–234). Do not use ‘f.’ ‘ff.’ ‘op. cit.’ or ‘passim.’

### Bibliography

- A separate section titled ‘Bibliography’ should be included at the end of the article. The authors should be listed in alphabetical order. Different publications by the same author should be listed chronologically.
- Please make sure that all references in the body of the text are listed in the bibliography and, conversely, that all entries in the bibliography are referenced in the body of the text.
- If the author uses abbreviations for cited primary texts, an abbreviation key should be included at the beginning of the bibliography. E.g.:

AT Adam, C., Tannery, P. (eds.) 1996. *Oeuvres de Descartes*. Paris: Vrin.

ST Aquinas, T. 1964–1981. *Summa theologiae*. Ed. and trans. T. Gilby et al. London: Eyre & Spottiswoode.

- Primary and secondary texts can be listed in one section or in separate sections.
- All titles of monographs and journals should be in italics. Titles of articles should be marked by single quotation marks.
- In the case of monographs and edited volumes, both the place of publication and the publisher should be listed.
- When listing multiple publications by a single author published in one year, the year of publication should be supplemented with lowercase letters to indicate the difference (e.g., 1995a, 1995b etc.).
- Journal article DOIs should not be included in the references.

- Examples:

#### Monographs:

Arendt, H. 1958. *The Human Condition*. Chicago: Chicago University Press.

Denniston, J. D. 1954. *The Greek Particles*, 2nd ed. Oxford: Oxford University Press.

#### Journal articles:

Foot, P. 1972. ‘Morality as a System of Hypothetical Imperatives.’ *Philosophical Review* 81(3), 305–316.

#### Articles in edited volumes:

Davidson, D. 1970. ‘How is weakness of the will possible?’ In J. Feinberg (ed.), *Moral Concepts*. Oxford: Oxford University Press, 93–113.

#### Publications with two or more authors or editors:

Anderson, L., Haslanger, S., and Langton, R. 2012. ‘Language and Race.’ In G. Russell and D. G. Fara (eds.), *Routledge Companion to Philosophy of Language*. New York: Routledge Press, 753–767.

Breazeale, D. and Rockmore, T. (eds.) 2013. *Fichte's Vocation of Man: New Interpretive and Critical Essays*. Albany: State University of New York Press.

*Editions of collected classical works:*

Haq, S. N. (ed.) 2012. *The Philosophical Works of al-Kindī*. Trans. P. Adamson and P. Pormann. Karachi: Oxford University Press.

Helm, R. (ed.) 1905–1910. *Apulei opera quae supersunt*. Stuttgart and Leipzig: Teubner.

*Editions of individual classical works, either (a) or (b) for all referenced works:*

(a) Cicero, M. T. 1915. *De finibus bonorum et malorum libri quinque*. Ed. T. Schiche.

Leipzig: Teubner.

(b) Schliche, T. (ed.) 1915. M. Tullius Cicero: *De finibus bonorum et malorum libri quinque*.

Leipzig: Teubner.

## Book Reviews

Book reviews should be between 1,200 and 2,400 words. They should include the full bibliographical information of the reviewed book. E.g.:

Reydams-Schils, Gretchen. *Calcidius on Plato's Timaeus: Greek Philosophy, Latin Reception and Christian Contexts*. Cambridge / New York: Cambridge University Press 2020, ix + 243 pp.

For any other style issues, please consult the *Chicago Manual of Style*.

## Figures and figure captions

Graphs, line drawings, photographs, schemes, diagrams, etc. may be used to illustrate your findings. Publication of color figures is provided free of charge in both online and print editions. The publication quality always depends directly on the quality and size of the delivered data.

Please label the illustrations as “Figure”. Each figure should be uploaded separately as .jpg .eps, .png or .tiff file. Images should have a minimum resolution of 300 dpi (color or black-white pixel graphics/half-tone images) in the intended size (600dpi combination of pixel graphic and line drawing, 1200dpi for line drawings). When drawing bar graphs, use patterning/color instead of grey scales (faint shading may be lost upon reproduction). Figures should not display any frames.

Figures should be numbered consecutively using Arabic numerals (from 1) throughout the text. Please make sure that all figures are explicitly referred to in the text. Do not end the text immediately preceding the suggested positioning of a figure with a colon and avoid expressions such as “in Figure 1 below/above”, as the exact positioning of these elements cannot be determined until after the manuscript has been typeset. Note that figures will usually be placed on the top or the bottom of the page in the final layout.

Provide a concise and self-explanatory caption for each figure. In case of multi-part figures, please include a main caption as well as part figure captions.

The key to the symbols depicted in the figures should be included in the figure itself, where possible. Otherwise, include it in the caption. The caption itself should not be included in the figure.

Please make sure that letters, numbers, symbols, text, etc. included in the figure are clear, easy to read (not below 6pt, preferably in Arial or Helvetica) and uniform in style.

It is the authors' responsibility to use images that do not infringe on any copyrights, performing rights, trademark rights, personal rights or any other third-party rights or are otherwise unlawful. Copyright permissions can be obtained through the Copyright Clearance Center (<https://www.copyright.com/>).

## Tables and table captions

Number tables consecutively using Arabic numerals. Tables should be provided in an editable source format (Word, LaTeX). Please avoid handing in tables as image or Excel files.

Provide a short descriptive title, column heads, and (if necessary) footnotes to make each table self-explanatory. In column heads, separate units with a comma and use parentheses or square brackets for additional measures (e.g., %, range, etc.). Use footnotes in alphabetical order (a, b, c, etc.) to give emphasis or further information. Expand abbreviations used in tables in footnotes.

In case bold type or italics are used to highlight information, please explain their meaning.

Avoid color, shading, vertical lines, and other cell borders. Note that most horizontal lines within the table body will be removed during the production process.

Indicate where to place the table approximately (e.g., [Place Table 1 near here]). Do not end the text immediately preceding the suggested positioning of a table with a colon and avoid expressions such as “in Table 1 below/above”, as the exact positioning of these elements cannot be determined until after the manuscript has been typeset. Note that tables will usually be placed on the top or the bottom of the page in the final layout.

**Please contact the editor for any further questions:**

Name: Carlo Davia

Email: [agp@degruyter.com](mailto:agp@degruyter.com)
